# Supplementary material for: N coupling with S-coordinated Ru nanoclusters for highly efficient hydrogen evolution in alkaline media
Source: Royal Society of Chemistry journal article supplement (doi:10.1039/d1ta02568f), 2021-01-01
Supplement: d1ta02568f1.pdf [file d1ta02568f1.pdf]

## Supporting Information

# N Coupling with S-Coordinated Ru Nanoclusters for Highly Efficient Hydrogen Evolution in Alkaline Media

Cheng-Fei Li,<sup>a</sup> Jia-Wei Zhao,<sup>a</sup> Ling-Jie Xie,<sup>a</sup> Yu Wang,<sup>a</sup> Hai-Bo Tang,<sup>a</sup> Li-Rong Zheng<sup>b,\*</sup> and Gao-Ren Li<sup>a,\*</sup>

<sup>a</sup>MOE Laboratory of Bioinorganic and Synthetic Chemistry, The Key Lab of Low-carbon Chemistry & Energy Conservation of Guangdong Province, School of Chemistry, Sun Yat-sen University, Guangzhou 510275, China

<sup>b</sup>Beijing Synchrotron Radiation Facility, Institute of High Energy Physics, Chinese Academy of Sciences, Beijing 100049, China

E-mail: [zhenglr@ihep.ac.cn](mailto:zhenglr@ihep.ac.cn); [ligaoren@mail.sysu.edu.cn](mailto:ligaoren@mail.sysu.edu.cn)

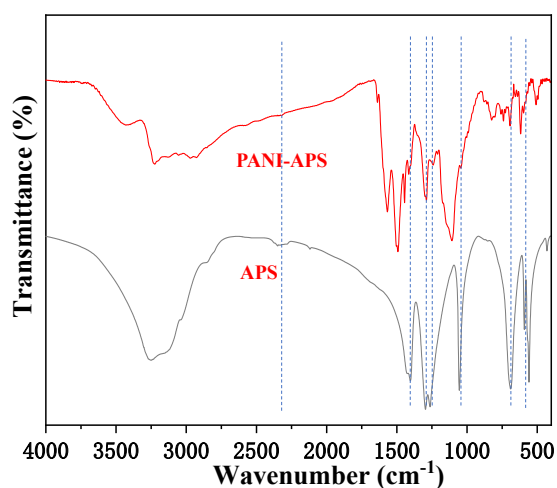

**Fig. S1** FT-IR spectra of PANI-APS (polyaniline-ammonia persulfate) and APS (ammonia persulfate) for reference.

Obviously, apart from these peaks at 1566, 1493, 1289, 1244, 1107 and 3434  $\text{cm}^{-1}$  ascribed to C–C stretching of the quinonoid ring and benzenoid ring, C–N stretching of secondary aromatic amines, C–H bindings of the benzenoid ring and the quinonoid ring and N–H stretching in FT-IR spectrum of PANI-

APS, respectively, other partial bands are consistent with APS, indicating existence of the APS in the framework of PANI-APS.

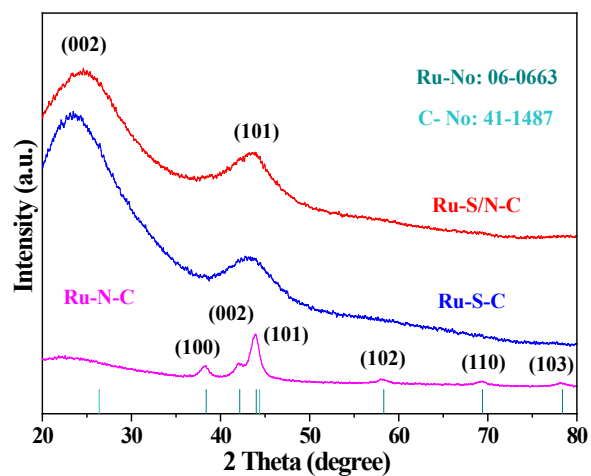

Fig. S2 XRD patterns of Ru-S/N-C, Ru-S-C and Ru-N-C.

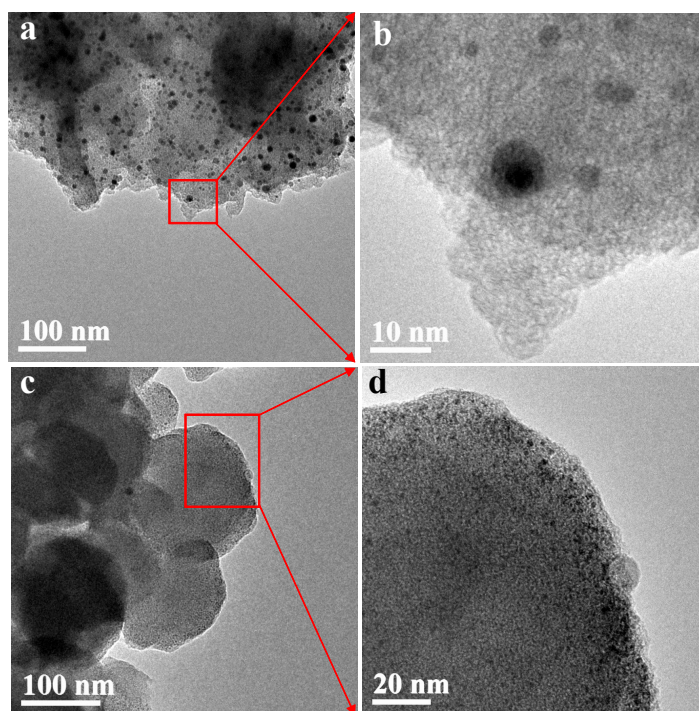

Fig. S3 a) and b) TEM images of Ru-N-C with different magnifications; c) and d) TEM images of Ru-S-C with different magnifications.

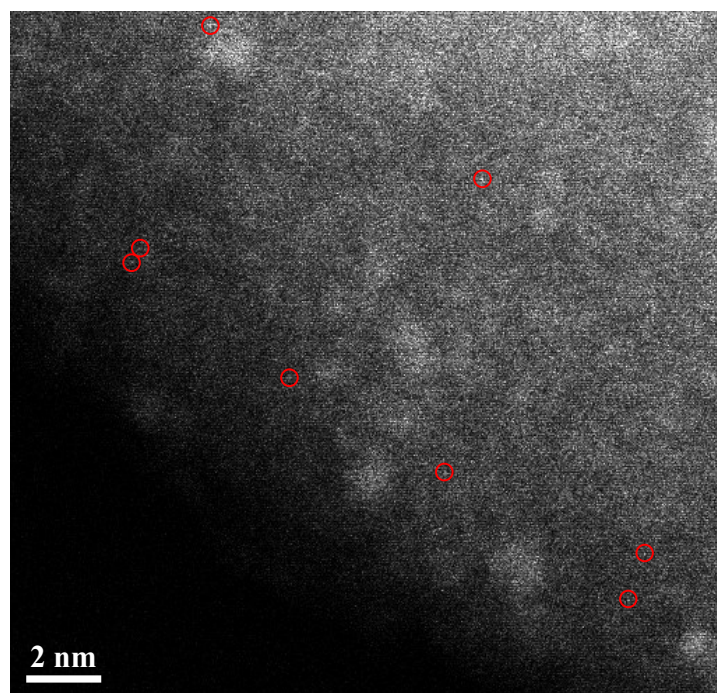

**Fig. S4** The aberration-corrected HAADF-TEM of Ru-S/N-C. The Ru single-atoms were marked by the red circles.

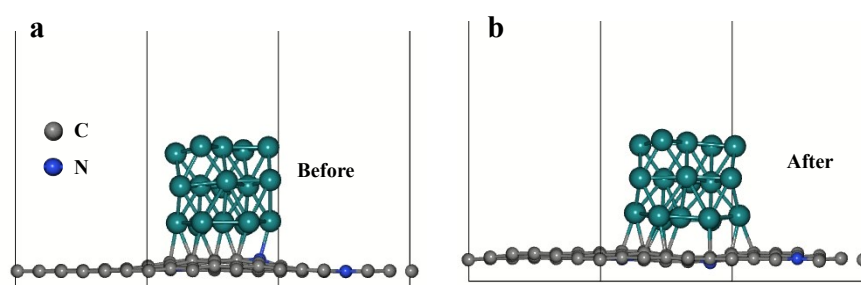

**Fig. S5** Theoretical models of Ru-N-C before (a) and after (b) structural optimization.

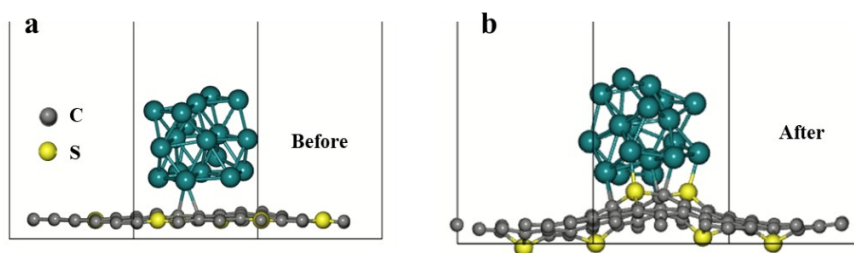

**Fig. S6** Theoretical models of Ru-S-C before (a) and after (b) structural optimization.

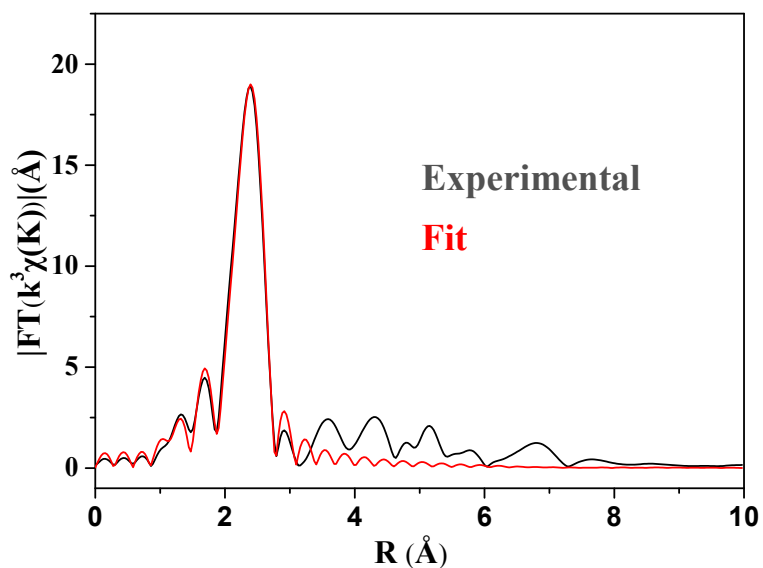

**Fig. S7** FT-EXAFS fitting curves of the Ru-S/N-C at Ru K-edge.

**Table S1.** EXAFS fitting parameters at the Ru K-edge for various samples

| Sample   | Shell | N <sup>a</sup> | R (Å) <sup>b</sup> | $\sigma^2$ (Å <sup>2</sup> ·10 <sup>-3</sup> ) <sup>c</sup> | $\Delta E_0$ (eV) <sup>d</sup> | R factor (%) |
|----------|-------|----------------|--------------------|-------------------------------------------------------------|--------------------------------|--------------|
| Ru-S/N-C | Ru-S  | 1.2 ± 0.4      | 2.15 ± 0.03        | 6.9 ± 1.3                                                   | -7.3 ± 0.8                     | 0.7          |
|          | Ru-Ru | 7.2 ± 0.6      | 2.68 ± 0.01        | 5.5 ± 1.0                                                   | 5.5 ± 1.5                      |              |

<sup>a</sup> N: coordination numbers; <sup>b</sup> R: bond distance; <sup>c</sup>  $\sigma^2$ : Debye-Waller factors; <sup>d</sup>  $\Delta E_0$ : the inner potential correction. R factor: goodness of fit.  $SO_2$  were set as 0.815/0.823 for Ru-S/Ru-Ru, which were obtained from the experimental EXAFS fit of reference Ru powder/ RuS<sub>2</sub> by fixing CN as the known crystallographic value and was fixed to all the samples.

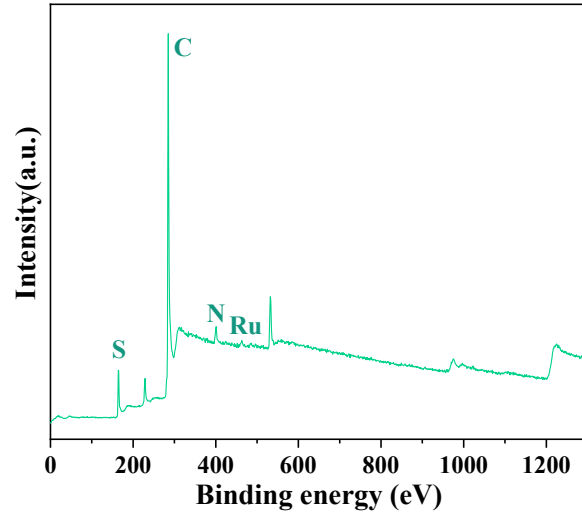

**Fig. S8** The survey XPS pattern of Ru-S/N-C.

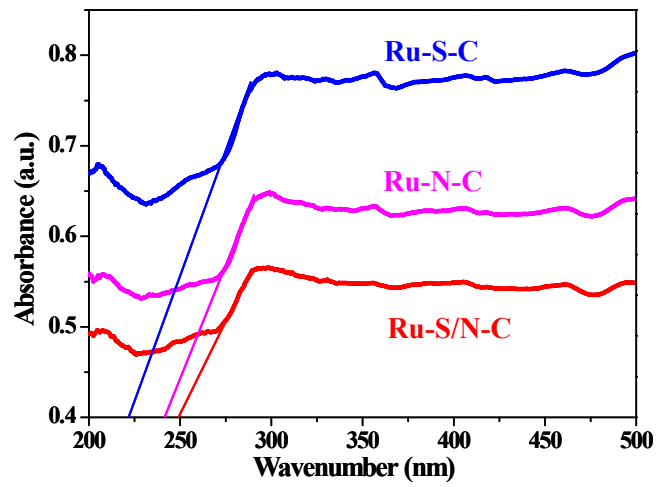

**Fig. S9** UV-Vis diffuse reflectance spectra of Ru-S/N-C, Ru-N-C, and Ru-S-C.

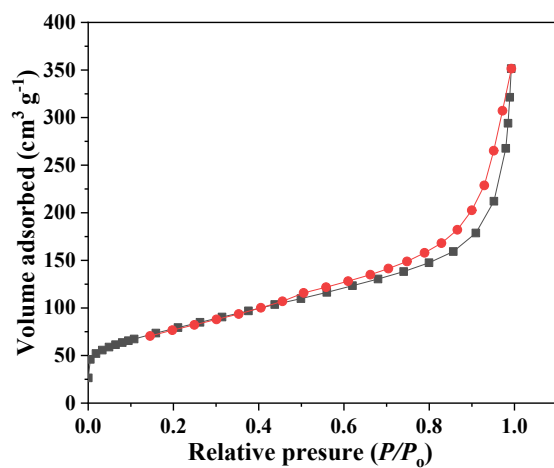

**Fig. S10**  $\text{N}_2$  adsorption–desorption isotherms of Ru-S/N-C.

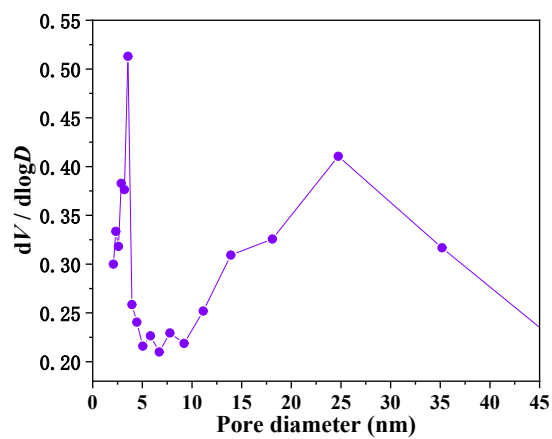

**Fig. S11** Pore size distribution plot of Ru-S/N-C.

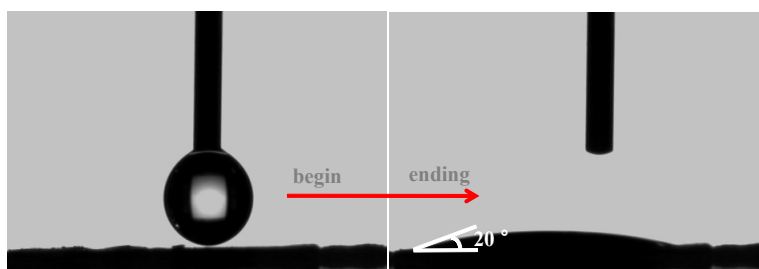

**Fig. S12** The contact angle measurement of Ru-S/N-C.

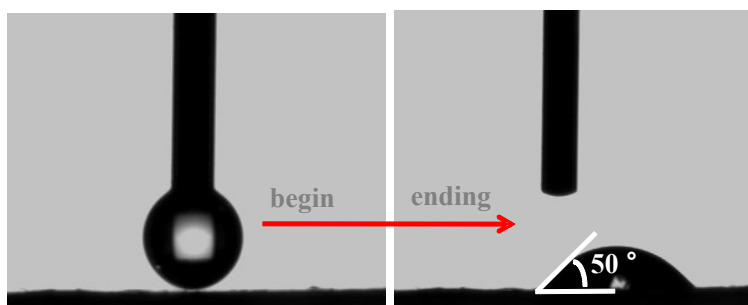

**Fig. S13** The contact angle measurement of Ru-S-C.

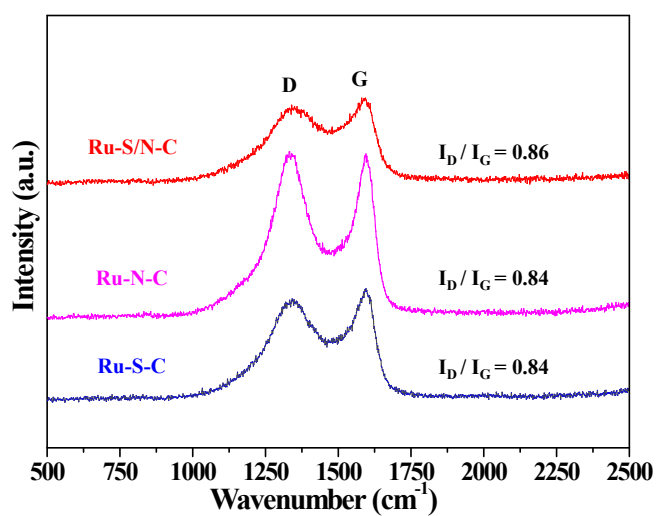

**Fig. S14** The Raman spectra of Ru-S/N-C, Ru-N-C and Ru-S-C.

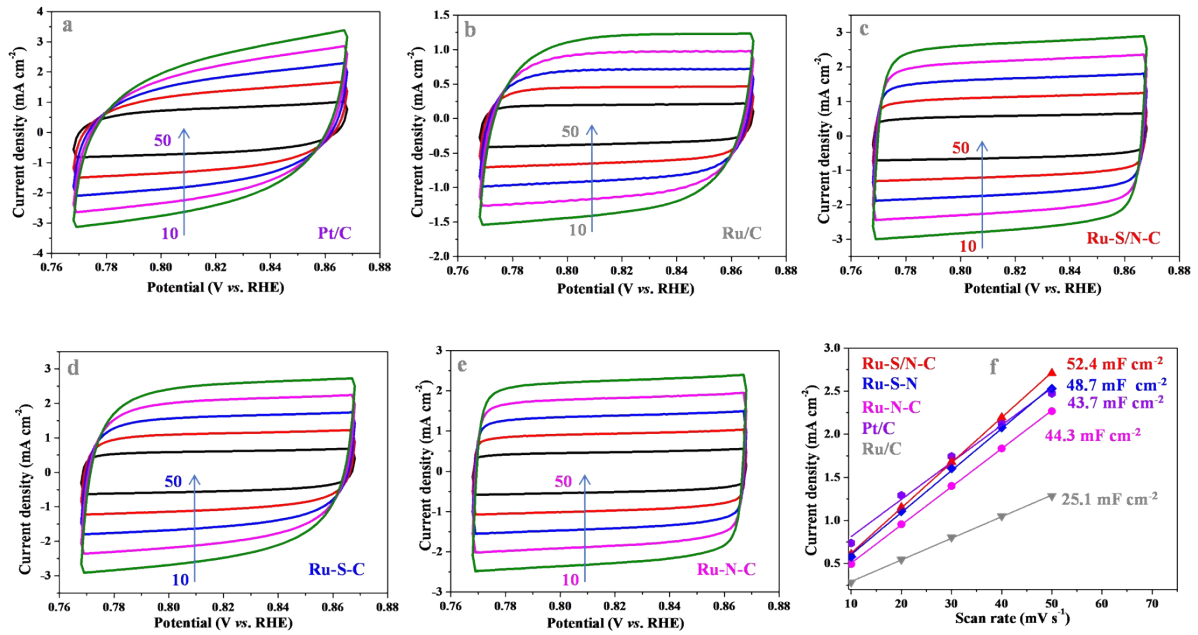

**Fig. S15** a-e) cyclic voltammetry curves, and f) current densities at 0.818 V plotted against scan rates for Pt/C, Ru/C, Ru-S/N-C, Ru-S-C and Ru-N-C (Corresponding  $C_{dl}$ ).

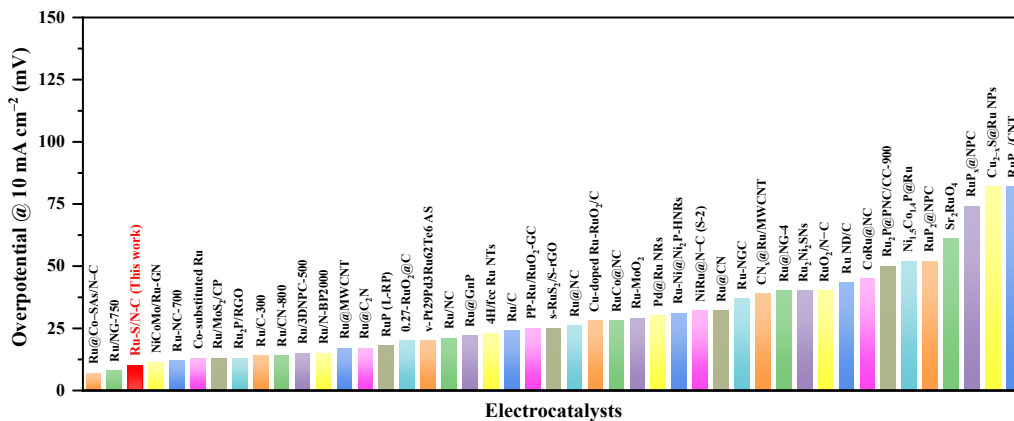

**Fig. S16** HER performance comparisons of Ru-S/N-C with those of the reported catalysts.



**Table S2.** The comparison of the catalytic activity of HER on Ru-S/N-C with the recently reported catalysts in 1.0 M KOH media.

| Catalysts                                                              | Overpotential (mV @10 mA cm <sup>-2</sup> ) | References                                         |
|------------------------------------------------------------------------|---------------------------------------------|----------------------------------------------------|
| Ru@Co-SAs/N-C                                                          | 7                                           | Nano Energy, 2019, 59, 472–480                     |
| Ru/NG-750                                                              | 8                                           | ACS Appl. Mater. Interfaces, 2017, 9, 3785–3791    |
| <b>Ru-S/N-C</b>                                                        | <b>10</b>                                   | <b>This work</b>                                   |
| NiCoMo/Ru-GN                                                           | 11.4                                        | J. Phys. Chem. C, 2018, 122, 17621–17631           |
| Ru-NC-700                                                              | 12                                          | Nat. Commun., 2019, 10, 631                        |
| Co-substituted Ru                                                      | 13                                          | Nat. Commun., 2018, 9, 4958                        |
| Ru/MoS <sub>2</sub> /CP                                                | 13                                          | Chem. Commun., 2018, 54, 3343–3346                 |
| Ru <sub>2</sub> P/RGO                                                  | 13                                          | Chem. Commun., 2018, 54, 3343–3346                 |
| Ru/C-300                                                               | 14                                          | J. Mater. Chem. A, 2018, 6, 14380–14386            |
| Ru/CN-800                                                              | 14                                          | ACS Sustainable Chem. Eng., 2018, 6, 11487–11492   |
| Ru/3DNPC-500                                                           | 15                                          | ACS Sustainable Chem. Eng., 2019, 7, 1178–1184     |
| Ru/N-BP2000                                                            | 15                                          | ChemCatChem 2019, 11, 4327-4333                    |
| Ru@C <sub>2</sub> N                                                    | 17                                          | Nat. Nanotechnol., 2017, 12, 441–446               |
| RuP (L-RP)                                                             | 18                                          | Adv. Mater., 30, 2018, 1800047                     |
| 0.27-RuO <sub>2</sub> @C                                               | 20                                          | Nano Energy, 2019, 55, 49–58                       |
| v-Pt <sub>29</sub> Pd <sub>3</sub> Ru <sub>62</sub> Te <sub>6</sub> AS | 20                                          | Nano Energy 2019, 61, 346–351                      |
| Ru/NC                                                                  | 21                                          | J. Mater. Chem. A, 2017, 5, 25314–25318            |
| Ru@GnP                                                                 | 22                                          | Adv. Mater., 30, 2018, 1803676                     |
| 4H/fcc Ru NTs                                                          | 23                                          | Small, 14, 2018,1801090                            |
| Ru/C                                                                   | 24                                          | Adv. Energy Mater., 8, 2018, 1801698               |
| PP-Ru/RuO <sub>2</sub> -GC                                             | 25                                          | ACS Catal., 2018, 8, 11094–11102                   |
| s-RuS <sub>2</sub> /S-rGO                                              | 25                                          | ACS Appl. Mater. Interfaces, 2018, 10, 34098–34107 |

|                                          |      |                                                    |
|------------------------------------------|------|----------------------------------------------------|
| Ru@NC                                    | 26   | Angew. Chem. Int. Ed., 2018, 130, 5950–5954        |
| Cu-doped Ru-RuO <sub>2</sub> /C          | 28   | Small, 2018, 14, 1803009                           |
| RuCo@NC                                  | 28   | Nat. Commun., 2017, 8, 14969                       |
| Ru-MoO <sub>2</sub>                      | 29   | J. Mater. Chem. A, 2017, 5, 5475–5485              |
| Pd@Ru NRs                                | 30   | ACS Appl. Mater. Interfaces, 10, 2018, 34147–34152 |
| Ru-Ni@Ni <sub>2</sub> P-HNRs             | 31   | J. Am. Chem. Soc., 2018, 140, 2731–2734            |
| NiRu@N–C (S-2)                           | 32   | J. Mater. Chem., A 2018, 6, 1376–1381              |
| Ru@CN                                    | 32   | Energy Environ. Sci., 2018, 11, 800–806            |
| Ru-NGC                                   | 37   | Chem. Commun., 2019, 55, 965–968                   |
| CN <sub>x</sub> @Ru/MWCNT                | 39   | ChemCatChem, 2019, 11, 1970–1976                   |
| Ru@NG-4                                  | 40   | Sustain. Energy Fuels, 2017, 1, 1028–1033          |
| Ru <sub>2</sub> Ni <sub>2</sub> SNs      | 40   | Nano Energy, 2018, 47, 1–7                         |
| RuO <sub>2</sub> /N–C                    | 40   | ACS Sustainable Chem. Eng., 2018, 6, 11529–11535   |
| Ru ND/C                                  | 43.4 | Chem. Commun., 2018, 54, 4613–4616                 |
| CoRu@NC                                  | 45   | Nanotechnology, 29, 225403 (2018)                  |
| Ru <sub>2</sub> P@PNC/CC-900             | 50   | ACS Appl. Energy Mater., 2018, 1, 3143–3150        |
| Ni <sub>1.5</sub> Co <sub>1.4</sub> P@Ru | 52   | Chem. Commun. 2017, 53, 13153–13156                |
| RuP <sub>2</sub> @NPC                    | 52   | Angew. Chem., Int. Ed. 2017, 56, 11559–11564       |
| Sr <sub>2</sub> RuO <sub>4</sub>         | 61   | Nat. Commun., 2019, 10, 149                        |
| ah-RuO <sub>2</sub> @C                   | 63   | Nano Energy, 2019, 55, 49–58                       |
| RuP <sub>x</sub> @NPC                    | 74   | ChemSusChem, 2018, 11, 743–752                     |
| Cu <sub>2-x</sub> S@Ru NPs               | 82   | Small, 2017, 13, 1700052                           |
| RuP <sub>2</sub> /CNT                    | 82   | Chemistry, 2019, 25, 8579-8584                     |
| RuO <sub>2</sub> -NWs@g-CN               | 95   | ACS Appl. Mater. Interfaces, 2016, 8, 28678–28688  |

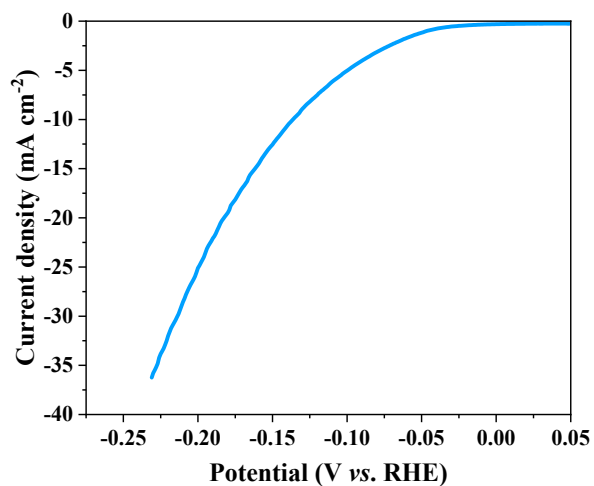

**Fig. S17** HER polarization plot of C-N/S in 1.0 M KOH.

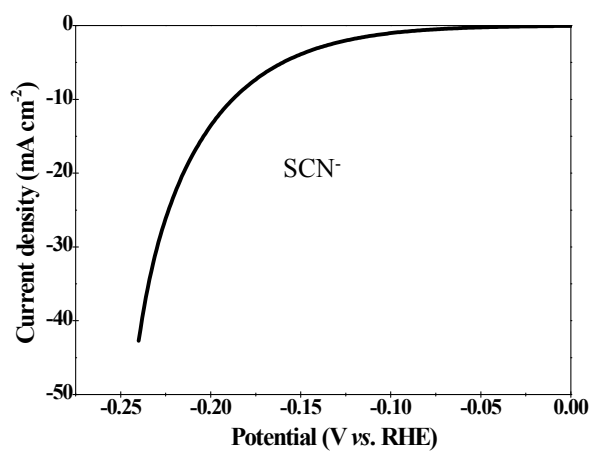

**Fig. S18** HER polarization plot of Ru-S/N-C with 10 mM KSCN in 1.0 M KOH, indicating that SCN ions strongly poison the active center of Ru-S/N-C catalyst.

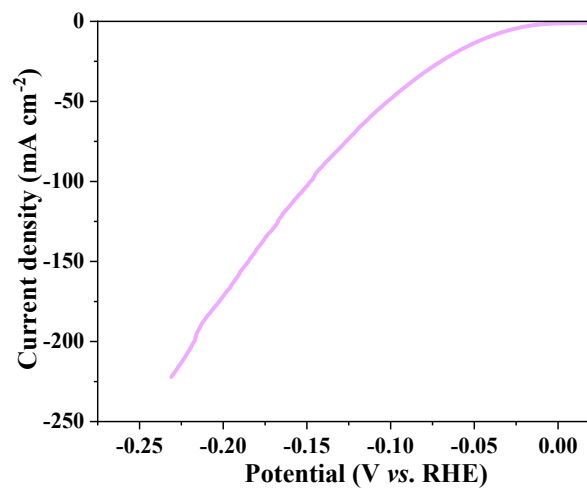

**Fig. S19** HER polarization plot of physically mixed Ru/C-S-N in 1.0 M KOH.

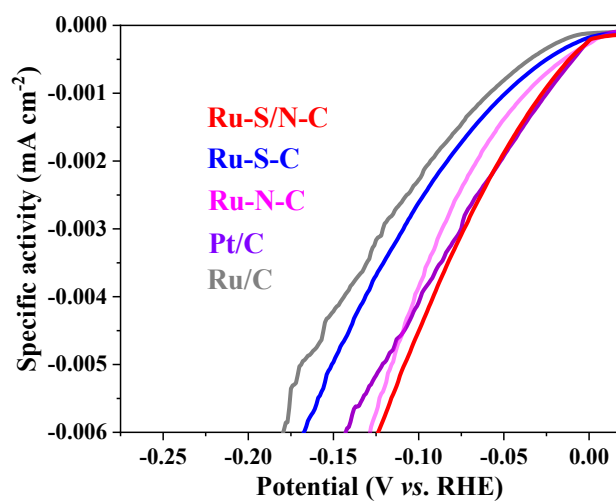

**Fig. S20** Comparisons of specific activities of Pt/C, Ru/C, Ru-S/N-C, Ru-S-C and Ru-N-C.

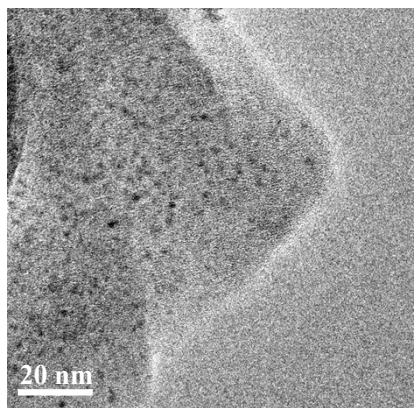

**Fig. S21** High-resolution image of Ru-S/N-C after cycling in 1.0 M KOH electrolyte.

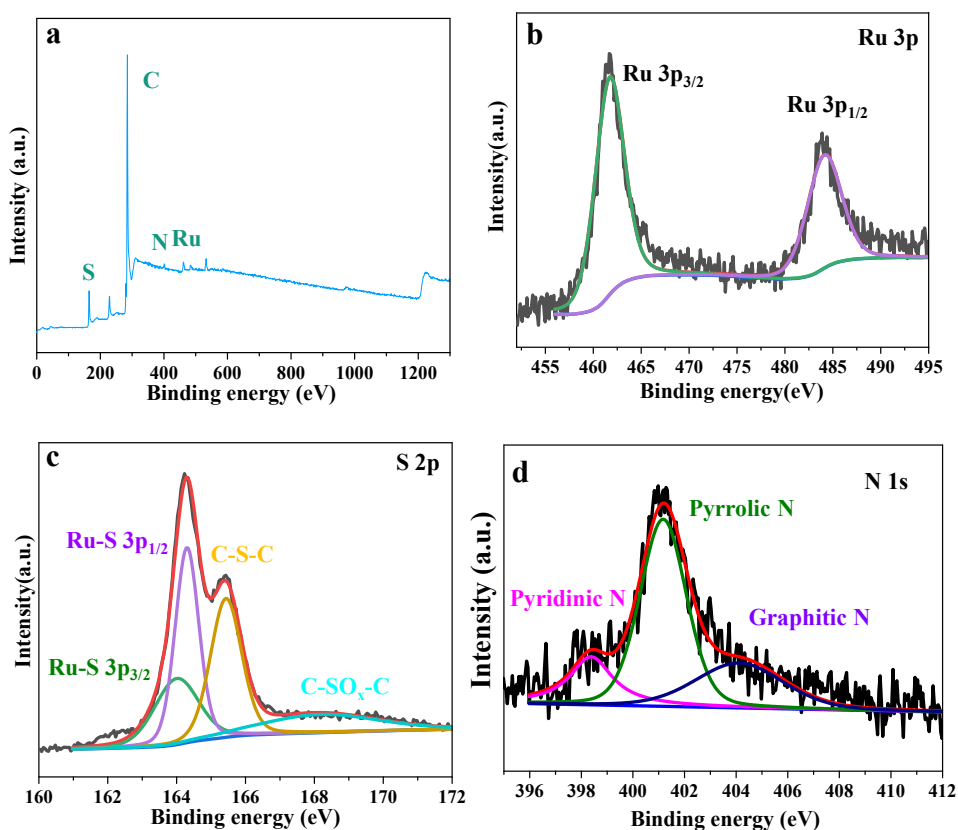

**Fig. S22** a) XPS survey spectra. High-resolution XPS spectra of b) Ru 3p, c) S 2p and d) N 1s for Ru-S/N-C after cycling.

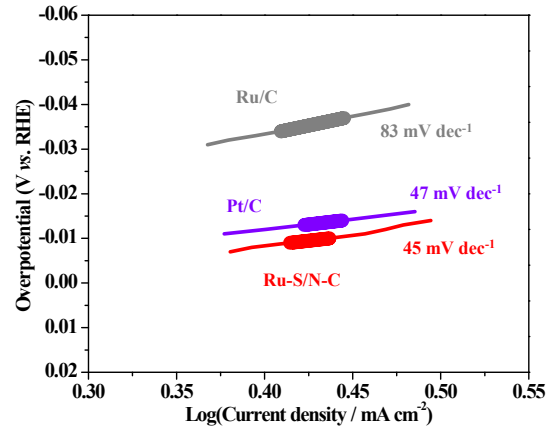

**Fig. S23** Tafel plots of Ru-S/N-C, Pt/C and Ru/C

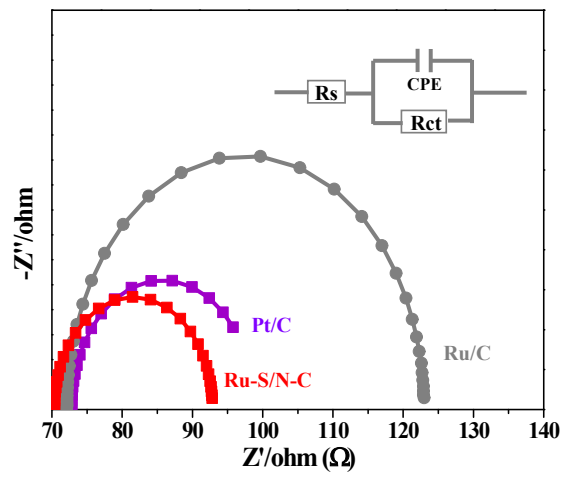

**Fig. S24** Nyquist plots for Ru-S/N-C, Pt/C and Ru/C.

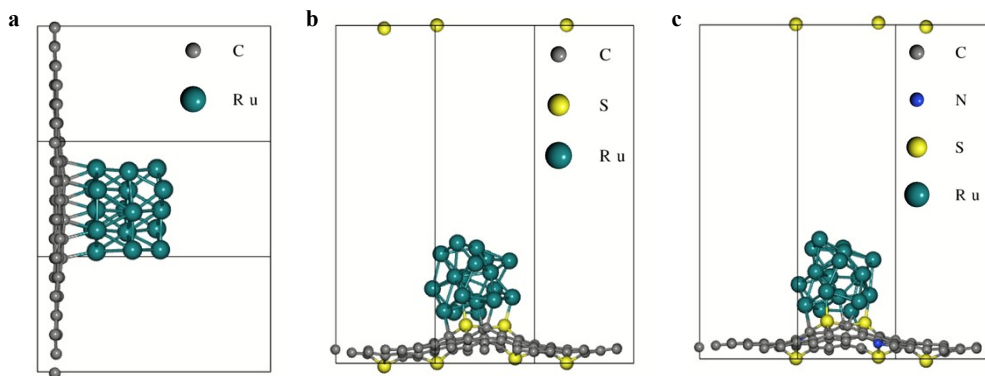

**Fig. S25** Theoretical calculated models of Ru/C, Ru/S-C and Ru-S/N-C.

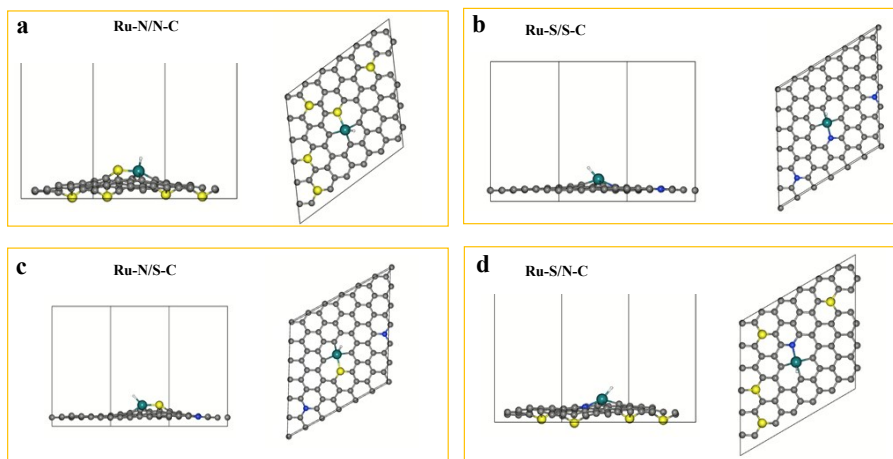

**Fig. S26** a-d) Side and top views of theoretical calculated models for  $\text{Ru}_{\text{single atom-S/N-C}}$ ,  $\text{Ru}_{\text{single atom-N/N-C}}$ ,  $\text{Ru}_{\text{single atom-N/S-C}}$  and  $\text{Ru}_{\text{single atom-S/S-C}}$ .

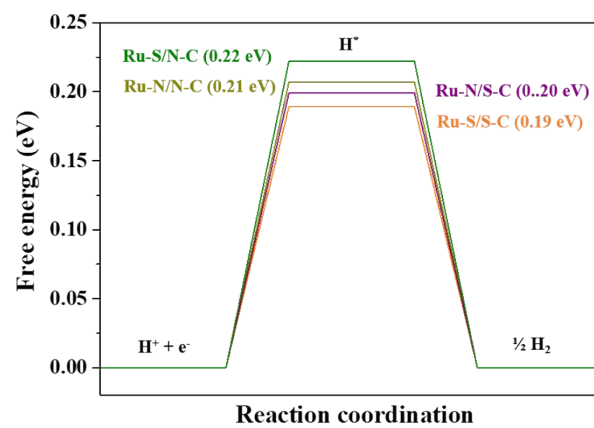

**Fig. S27**  $\Delta G_{H^*}$  calculated for hydrogen evolution reaction on various catalysts.
